# Supplementary material for: KIAA1114, a full-length protein encoded by the trophinin gene, is a novel surface marker for isolating tumor-initiating cells of multiple hepatocellular carcinoma subtypes
Source: PubMed Central journal article supplement (PMC4012722; doi:10.18632/oncotarget.1677), 2014-03-31
Supplement: oncotarget-05-1226-s001.pdf [file oncotarget-05-1226-s001.pdf]

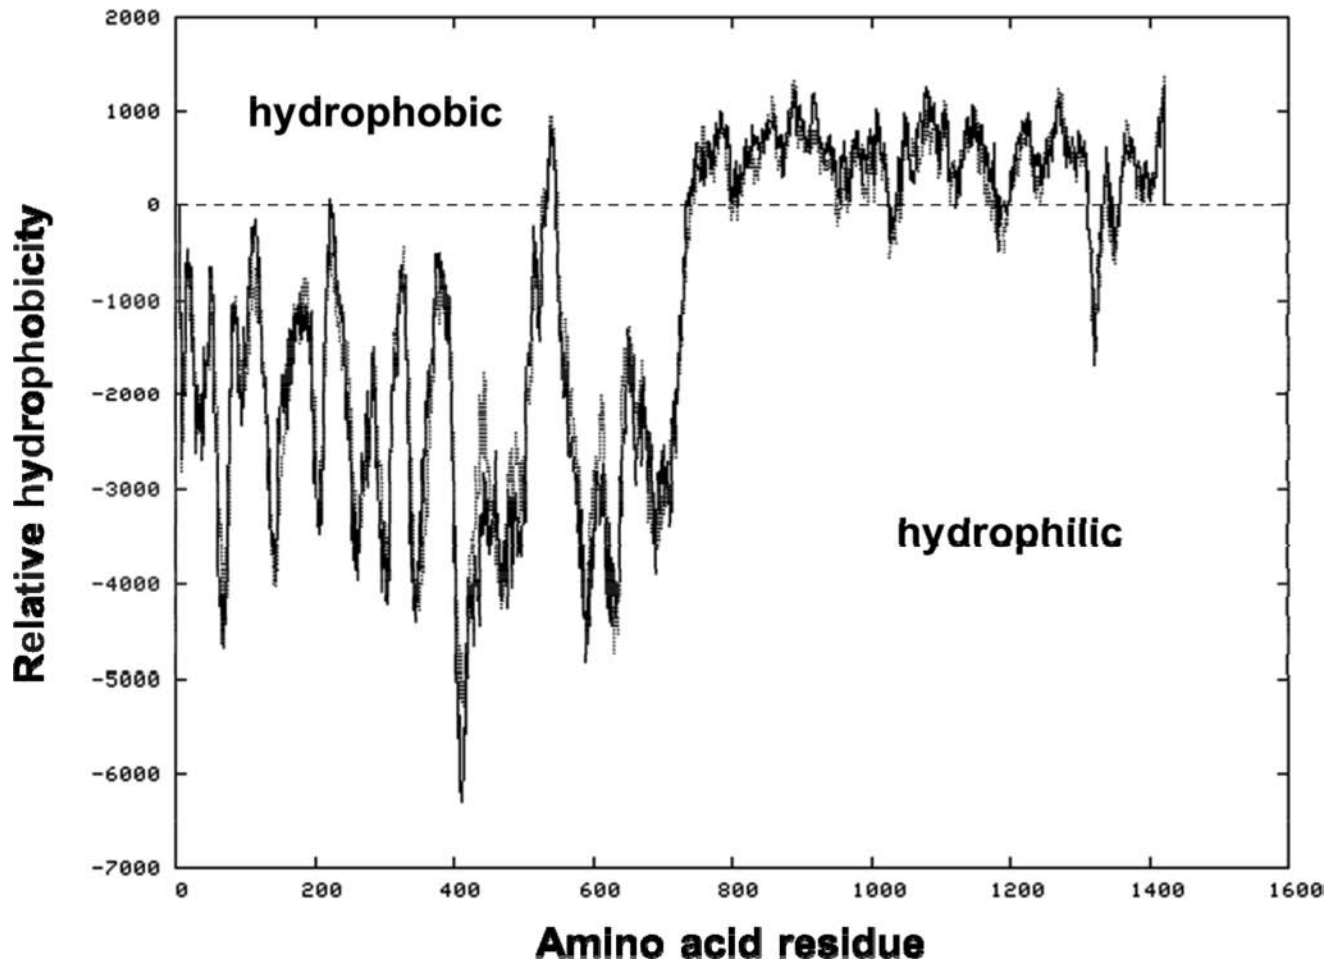

**Supplementary Figure S1: Hydropathy analysis of human KIAA1114.** The hydropathy plot of human KIAA1114 was generated by TMPred program ([http://www.ch.embnet.org/software/TMPRED\\_form.html](http://www.ch.embnet.org/software/TMPRED_form.html)).

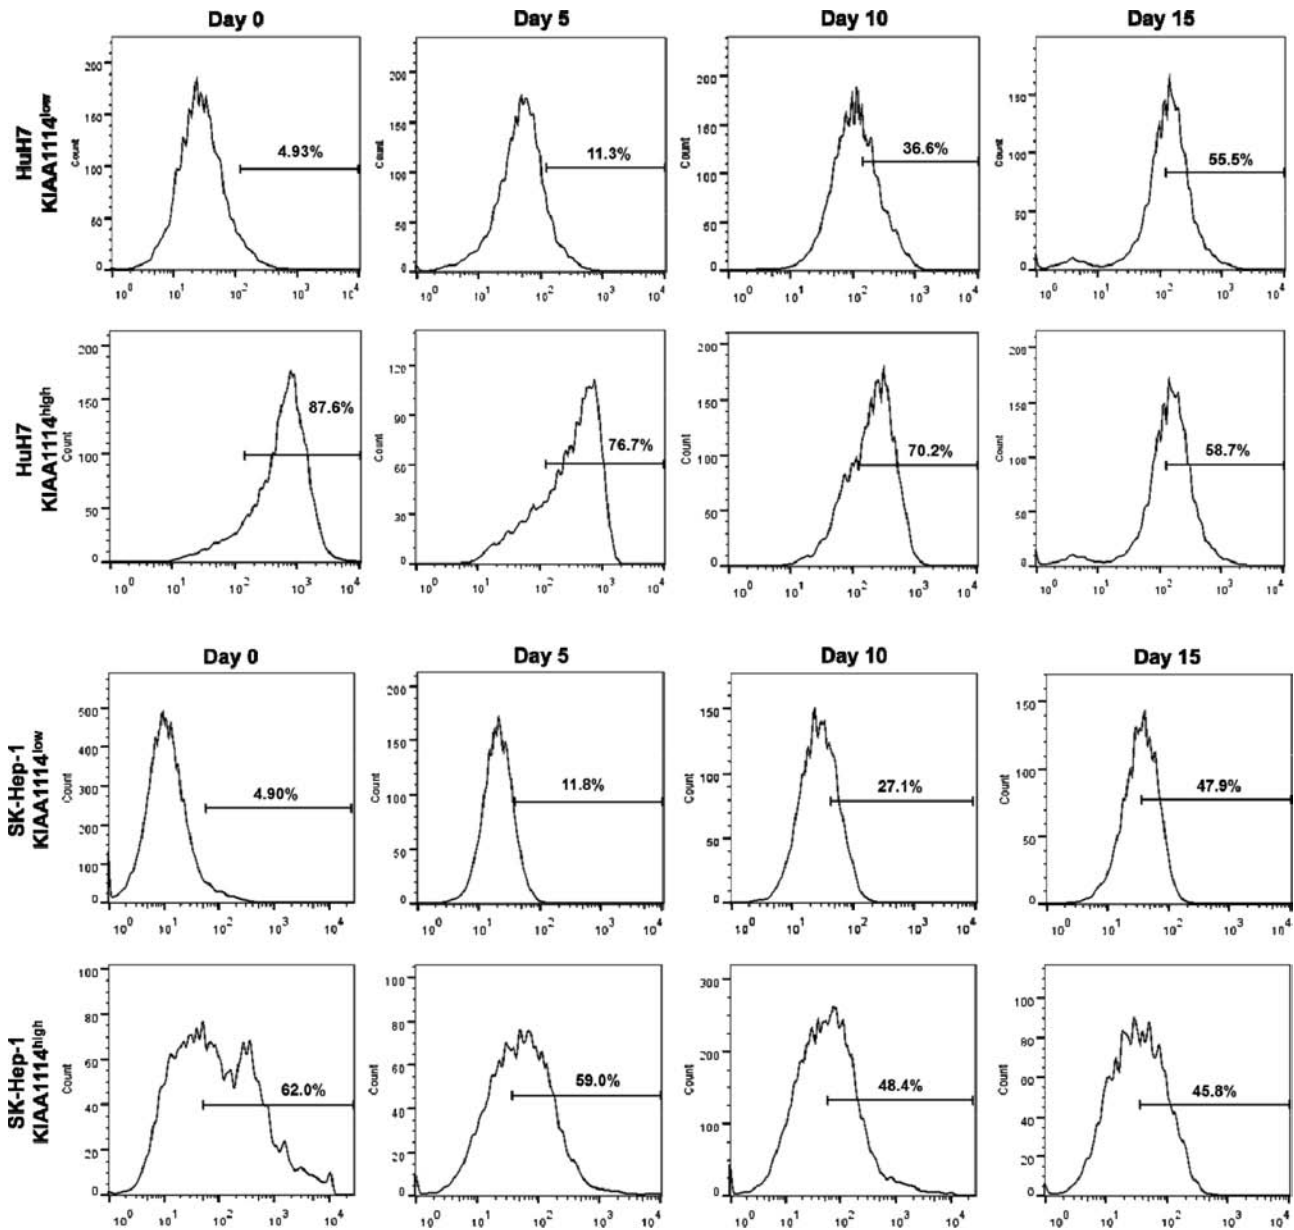

**Supplementary Figure S2: KIAA1114 expression in sorted HCC fractions upon short-term culture.** Flow cytometric analysis of KIAA1114 expression in Huh7- and SK-Hep-1 derived KIAA1114<sup>high</sup> and KIAA1114<sup>low</sup> cells immediately after isolation and after culturing for 5, 10, and 15 days.

**Supplementary Table S1: KIAA1114 expression in epithelial cancer cell lines**

| Liver (HCC)        |                           | Liver (CC)         |                           |
|--------------------|---------------------------|--------------------|---------------------------|
| Cell line (origin) | KIAA1114 (%) <sup>a</sup> | Cell line (origin) | KIAA1114 (%) <sup>a</sup> |
| HepG2 (H)          | 10.5±4.2                  | JCK (H)            | 0.5±0.2                   |
| Hep3B (H)          | 71.6±7.1                  | Cho-CK (H)         | 8.3±2.2                   |
| HuH7 (H)           | 94.5±3.8                  | Choi-CK (H)        | 62.8±5.5                  |
| SNU475 (H)         | 21.1±6.2                  | SCK (H)            | 88±4.3                    |
| SH-J1 (H)          | 27.8±5.5                  |                    |                           |
| SK-Hep-1 (H)       | 68.3±2.5                  |                    |                           |

| Breast             |              | Brain, nervous system |              |
|--------------------|--------------|-----------------------|--------------|
| Cell line (origin) | KIAA1114 (%) | Cell line (origin)    | KIAA1114 (%) |
| T47D (H)           | 44.1         | U-373 MG (H)          | 31.6         |
| MDA-MB-436 (H)     | 69.2         | U-87 MG (H)           | 33.7         |
| MDA-MB-468 (H)     | 70.8         | U-343 MG (H)          | 37.8         |
| SKBR3 (H)          | 74           | U-118 MG (H)          | 57.4         |
| MDA-MB-231 (H)     | 86.5         | LN-18 (H)             | 74.6         |
| 4T1 (M)            | 94.2         | GL-261 (M)            | 22.5         |

| Colorectal         |              | Ovary                      |              |
|--------------------|--------------|----------------------------|--------------|
| Cell line (origin) | KIAA1114 (%) | Cell line (origin)         | KIAA1114 (%) |
| SW480 (H)          | 1.8          | C13 (H)                    | 8.2          |
| LoVo (H)           | 37.5         | OV2008 (H)                 | 75.7         |
| HCT-8 (H)          | 62.6         | A2780-Tax <sup>b</sup> (H) | 27.2         |
| HCT116 (H)         | 97.9         | A2780 (H)                  | 81.4         |
| MC38 (M)           | 63.3         | SKOV3-Tax <sup>b</sup> (H) | 19.8         |
| CT26 (M)           | 97.2         | SKOV3 (H)                  | 64.3         |

| Melanoma of skin   |              | Kidney             |              |
|--------------------|--------------|--------------------|--------------|
| Cell line (origin) | KIAA1114 (%) | Cell line (origin) | KIAA1114 (%) |
| A375 (H)           | 15.5         | A498 (H)           | 55.6         |
| A375P (H)          | 18.5         | 786-O (H)          | 78.3         |
| A375SM (H)         | 19.9         | Renca (M)          | 20           |
| B16F10 (M)         | 34.2         |                    |              |

<sup>a</sup>The percentage of KIAA1114<sup>high</sup> cells in liver cancer cell lines were represented as mean ± SEM of eight independent experiments. KIAA1114 expression levels in other tissue-derived cell lines were represented as the mean percentage of at least three independent flow cytometric analyses.

<sup>b</sup>Taxol-resistant cell lines. H: Human origin; M: Mouse origin.

**Supplementary Table S2: Expression levels of KIAA1114 and liver TIC markers in human HCC cell lines**

| Cell line | AFP | CD133 (%) | CD90 (%)  | EpCAM (%) | CD13 (%) | CD24 (%)  | KIAA1114 (%) |
|-----------|-----|-----------|-----------|-----------|----------|-----------|--------------|
| HepG2     | +   | 4.7±1.2   | 0.5±0.3   | 0.9±0.2   | 99.2±4.7 | 3.3±1.1   | 10.5±4.2     |
| Hep3B     | +   | 93.2±3.7  | 0.04±0.01 | 97.6±3.7  | 63.4±7.4 | 7.6±1.8   | 70.6±9.1     |
| HuH7      | +   | 68.3±2.5  | 0.8±0.3   | 95.4±4.6  | 82.1±4.3 | 97.9±2.0  | 94.0±4.8     |
| SNU475    | –   | 0.9±0.4   | 88.1±3.2  | 5.2±2.3   | 63.2±6.2 | 0.07±0.02 | 19.1±8.2     |
| SH-J1     | –   | 0.2±0.05  | 97.5±4.6  | 0.6±0.09  | 99.0±3.8 | 0.1±0.03  | 34.7±6.1     |
| SK-Hep-1  | –   | 0.3±0.1   | 70.4±6.3  | 1.3±0.5   | 46.3±8.1 | 2.0±0.9   | 67.9±3.5     |

The numbers represent the mean ± SEM of six independent experiments.

**Supplementary Table S3: Sequences of the primers used in the present study**

| Gene                          | Forward primer (5'-3')  | Reverse primer (5'-3')  |
|-------------------------------|-------------------------|-------------------------|
| <i>Stemness-related genes</i> |                         |                         |
| ABCB1                         | TCACTTCAGGAAGCAACCAG    | ATTCCTCGAGAACTGCGAA     |
| ABCG2                         | CTGAGATCCTGAGCCTTTGG    | AAGCCATTGGTGTTCCTTG     |
| β-catenin                     | AGGTCTGAGGAGCAGCTTCA    | ATTGTCCACGCTGGATTTTC    |
| BMI                           | AATCCCCACCTGATGTGTGT    | GCTGGTCTCCAGGTAACGAA    |
| c-Myc                         | GCTGCTTAGACGCTGGATTT    | CACCGAGTCGTAGTCGAGGT    |
| GDF3                          | TGCTACGTAAAGGAGCTGGG    | TTCCCTTTCTTTGATGGCAG    |
| KLF4                          | AGAGTTCCCATCTCAAGGCA    | GTCAGTTCATCTGAGCGGG     |
| Nanog                         | GATTTGTGGGCCTGAAGAAA    | TTGGGACTGGTGAAGAATC     |
| POU5F1                        | ACTGCAGCAGATCAGCCACATCG | ATCCTCTCGTTGTGCATAGTCGC |
| ZFP42                         | GGTGGCATTGGAAATAGCAG    | TGCCTAGTGTGCTGGTGGT     |
| <i>Housekeeping gene</i>      |                         |                         |
| GADPH                         | AAGGTGAAGGTCGGAGTCAA    | AATGAAGGGGTCATTGATGG    |
